# Supplementary material for: Meta-analysis reveals gender difference in the association of liver cancer incidence and excess BMI
Source: PubMed Central journal article supplement (PMC5641183; doi:10.18632/oncotarget.20127), 2017-08-10
Supplement: oncotarget-08-72959-s001.pdf [file oncotarget-08-72959-s001.pdf]

# Meta-analysis reveals gender difference in the association of liver cancer incidence and excess BMI

## SUPPLEMENTARY MATERIALS

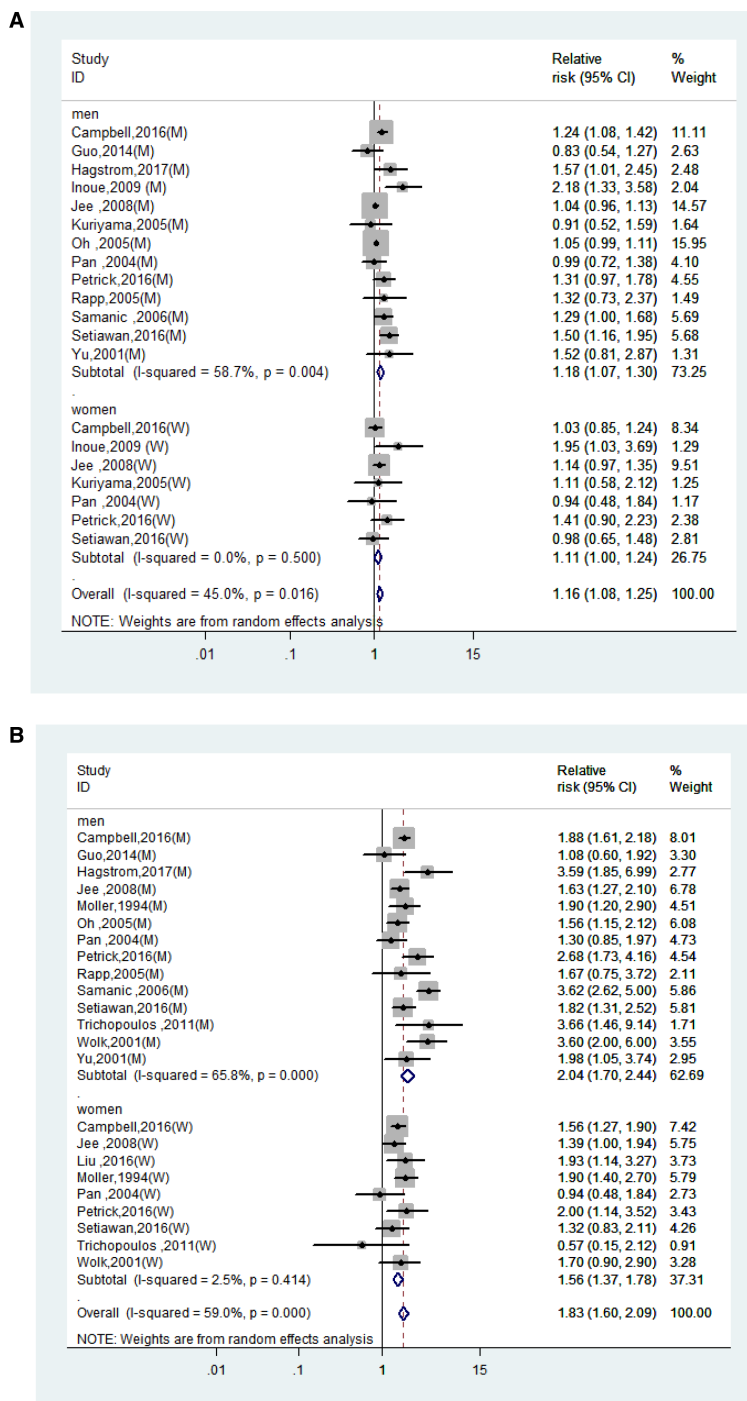

**Supplementary Figure 1: The relative risks of liver cancer incidence in overweight and obesity.** (A) Forest plots of the overweight vs. normal weight; (B) Forest plots of the obesity vs. normal weight. CI, confidence intervals; W, women; M, men.

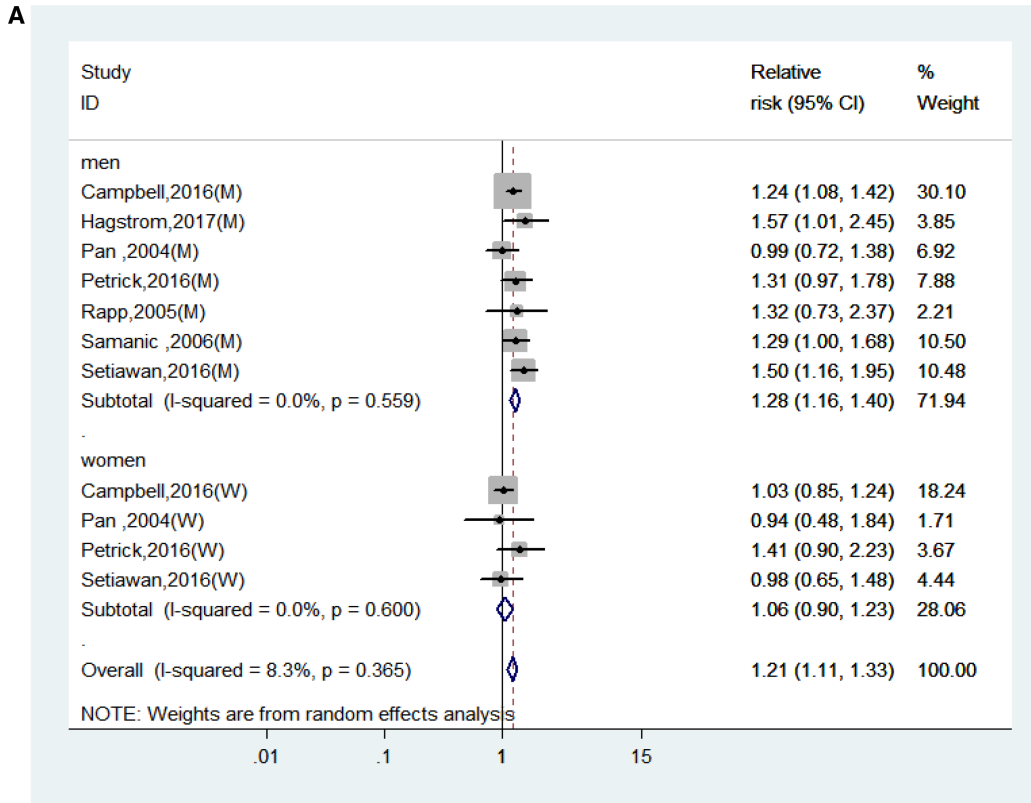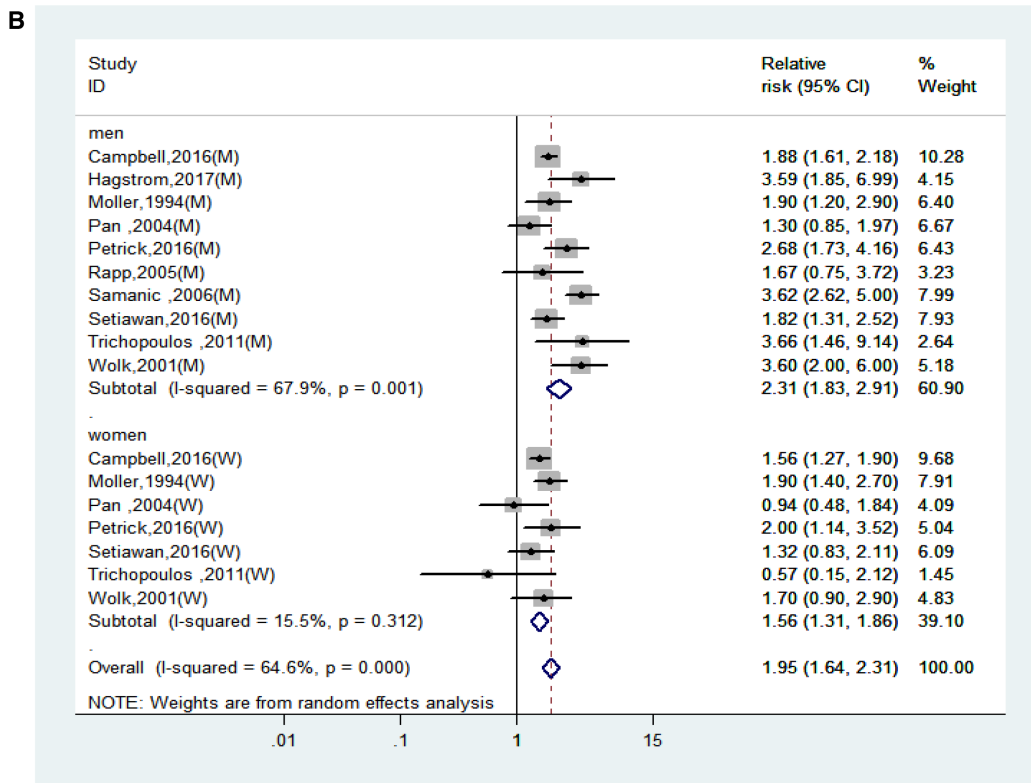

**Supplementary Figure 2: The relative risks of non-Asian overweight and obesity.** (A) Forest plots of the non-Asian overweight vs. normal weight; (B) Forest plots of the non-Asian obesity vs. normal weight. CI, confidence intervals; W, women; M, men.

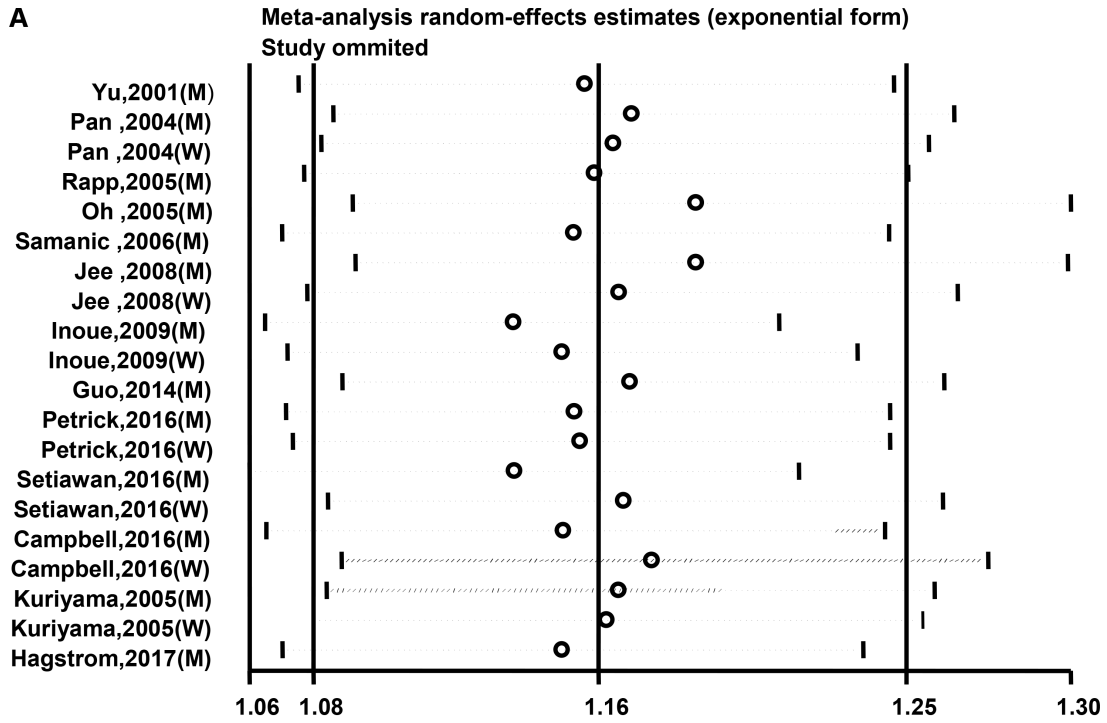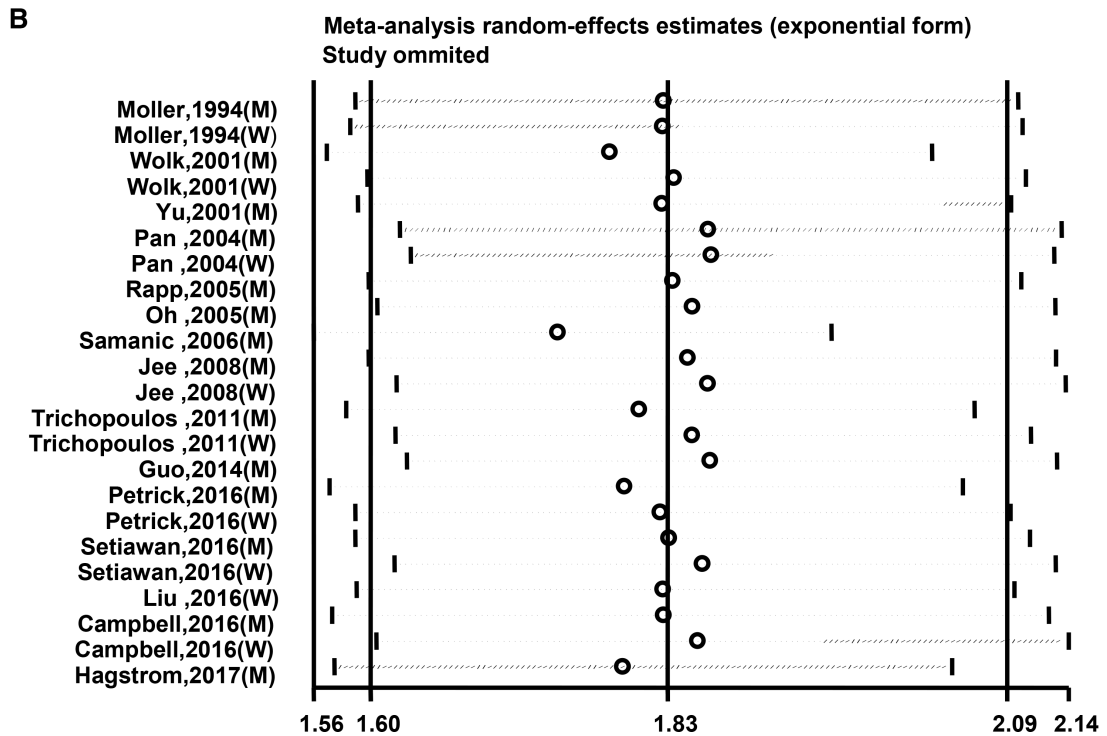

Supplementary Figure 3: Sensitivity analysis of the studies included in overall overweight (A) and obesity (B). W, women; M, men.

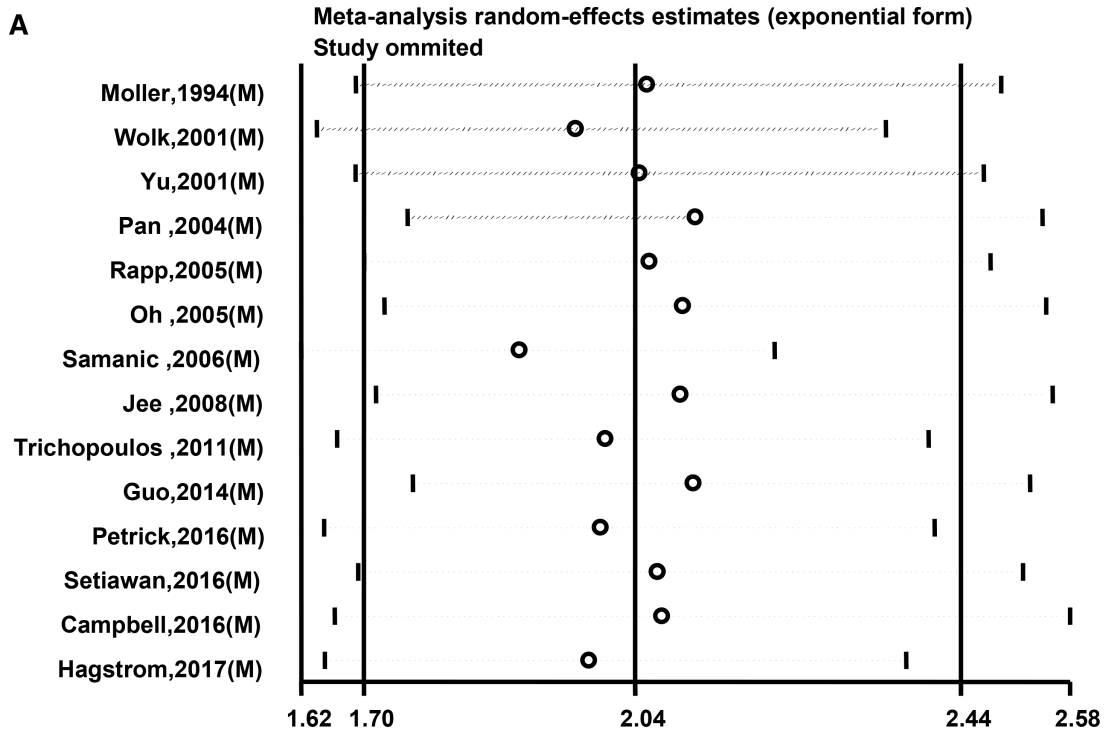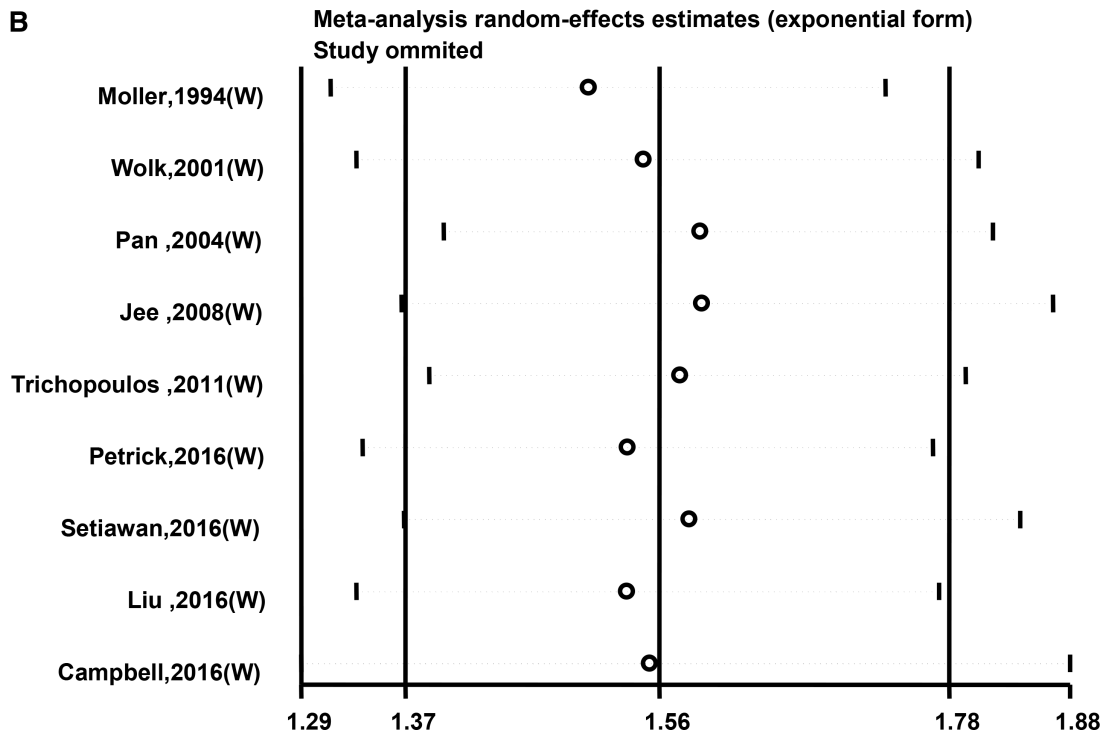

**Supplementary Figure 4:** Sensitivity analysis of the studies included in overall obesity men (A) and women (B). W, women; M, men.

**A**

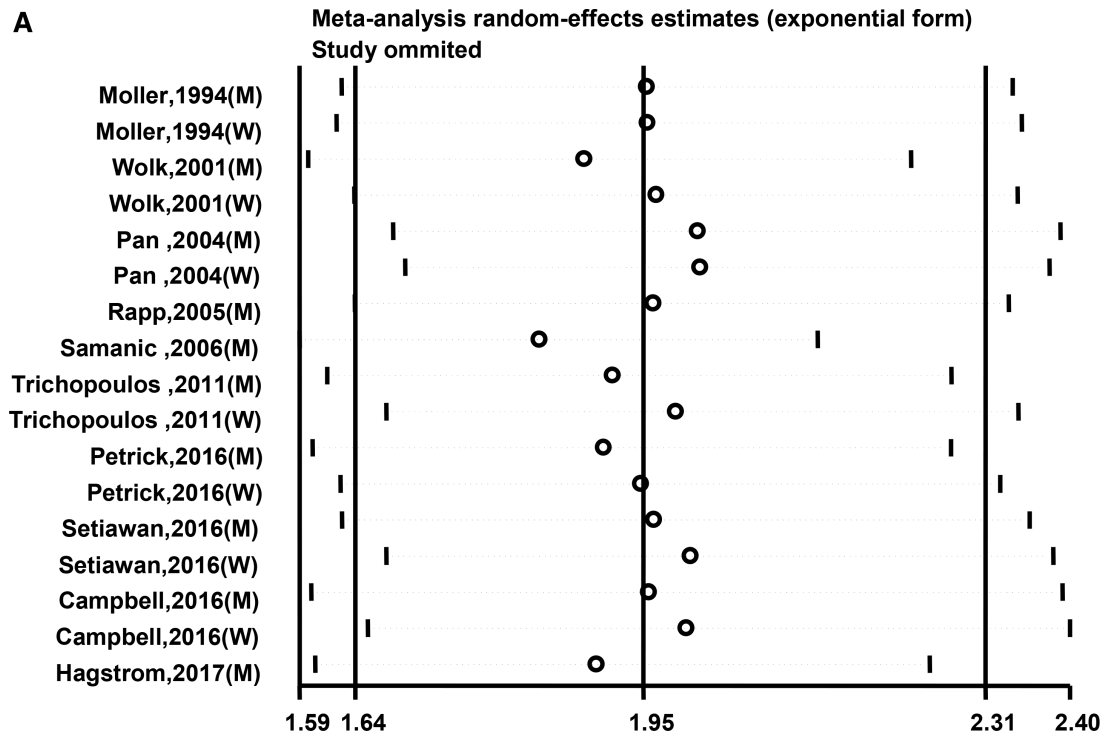

**B**

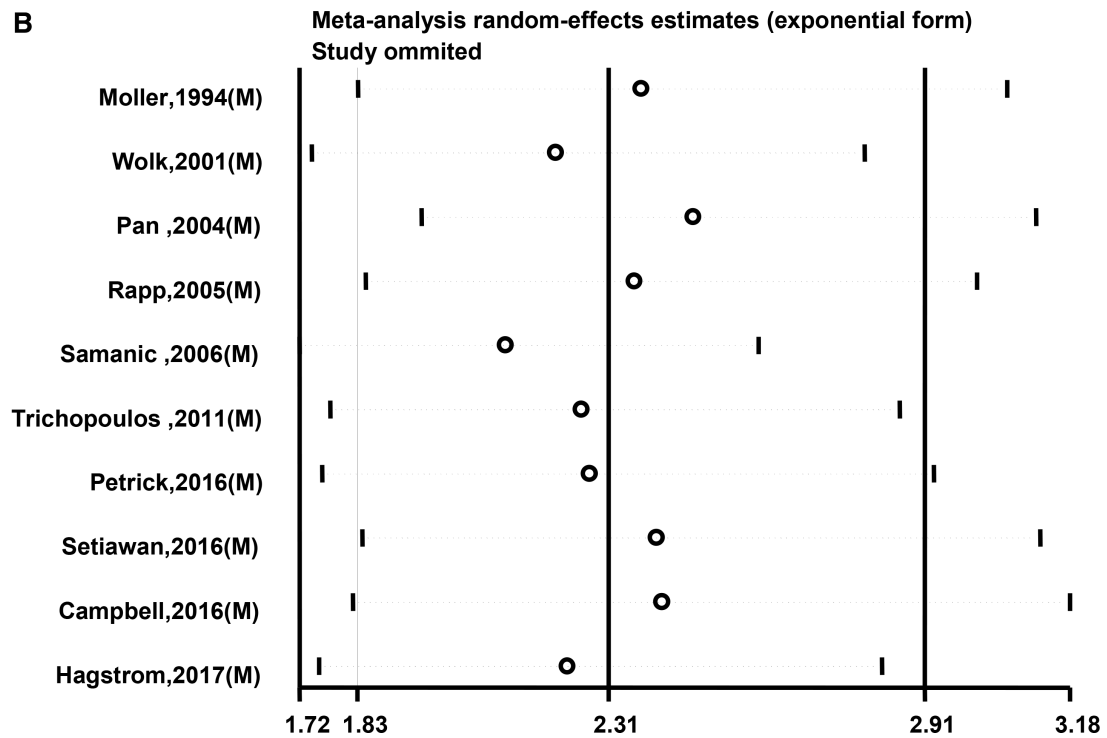

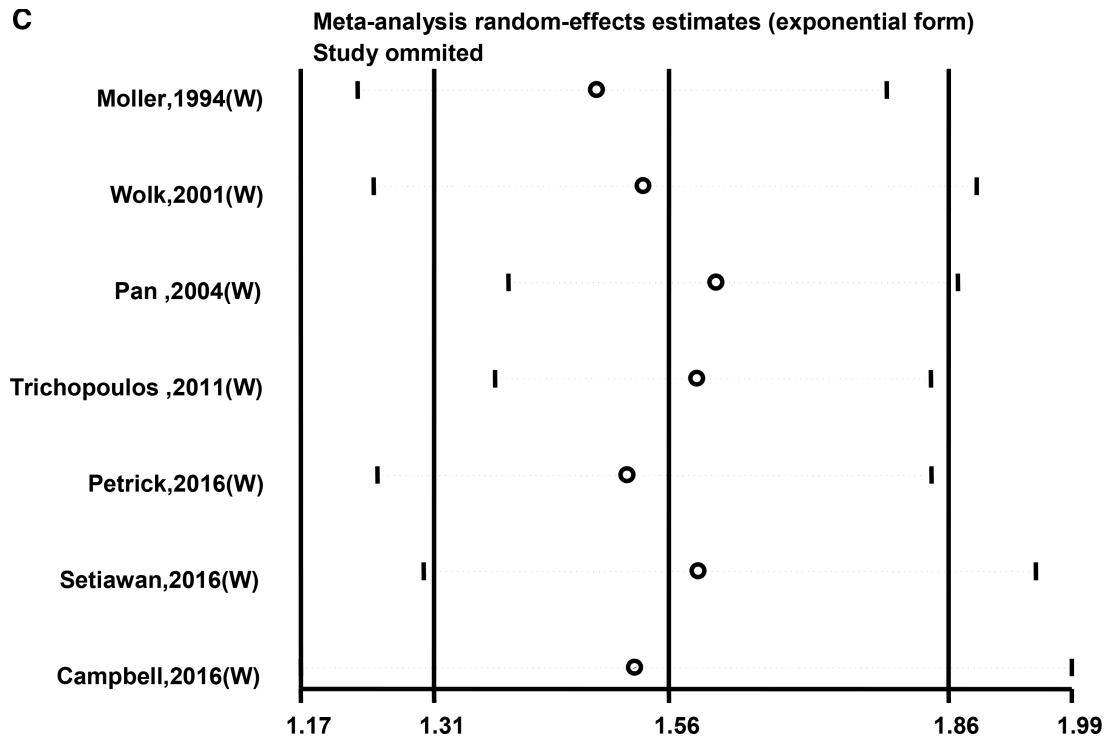

**Supplementary Figure 5:** Sensitivity analysis of the studies included in non-Asian overall obesity (A), men (B) and women (C). W, women; M, men.

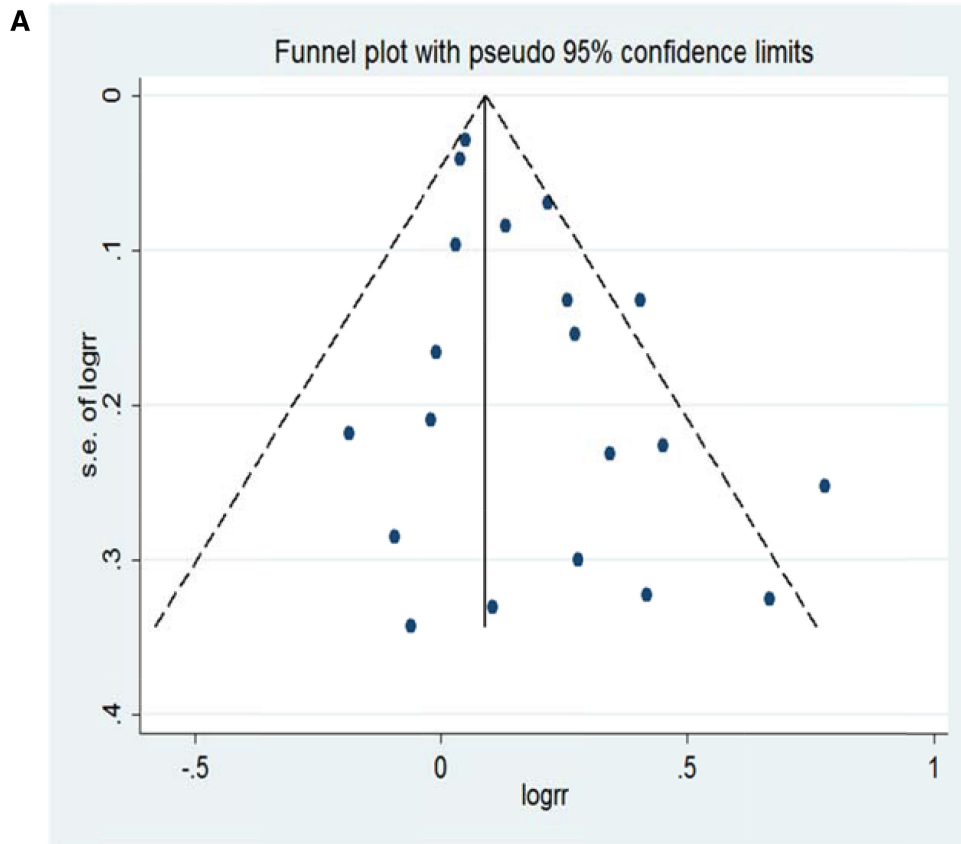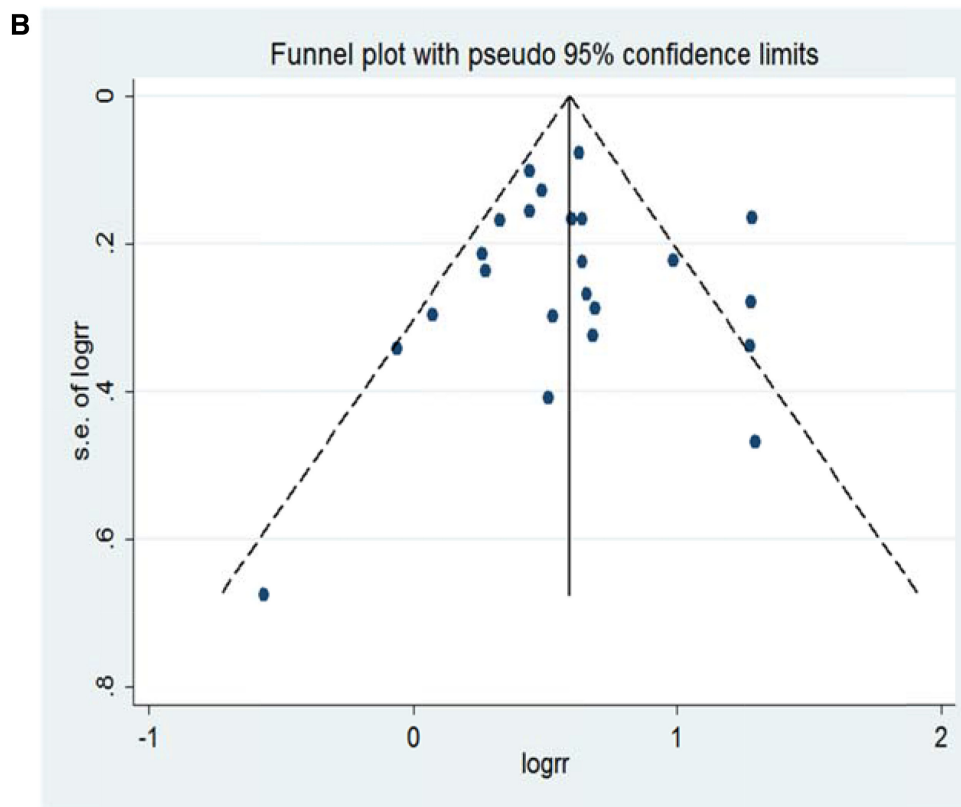

**Supplementary Figure 6: Funnel plot for all studies included in the meta-analysis of BMI and liver cancer incidence.** (A) overweight study ( $p = 0.022$  by Egger's test); (B) obesity study ( $p = 0.900$  by Egger's test).

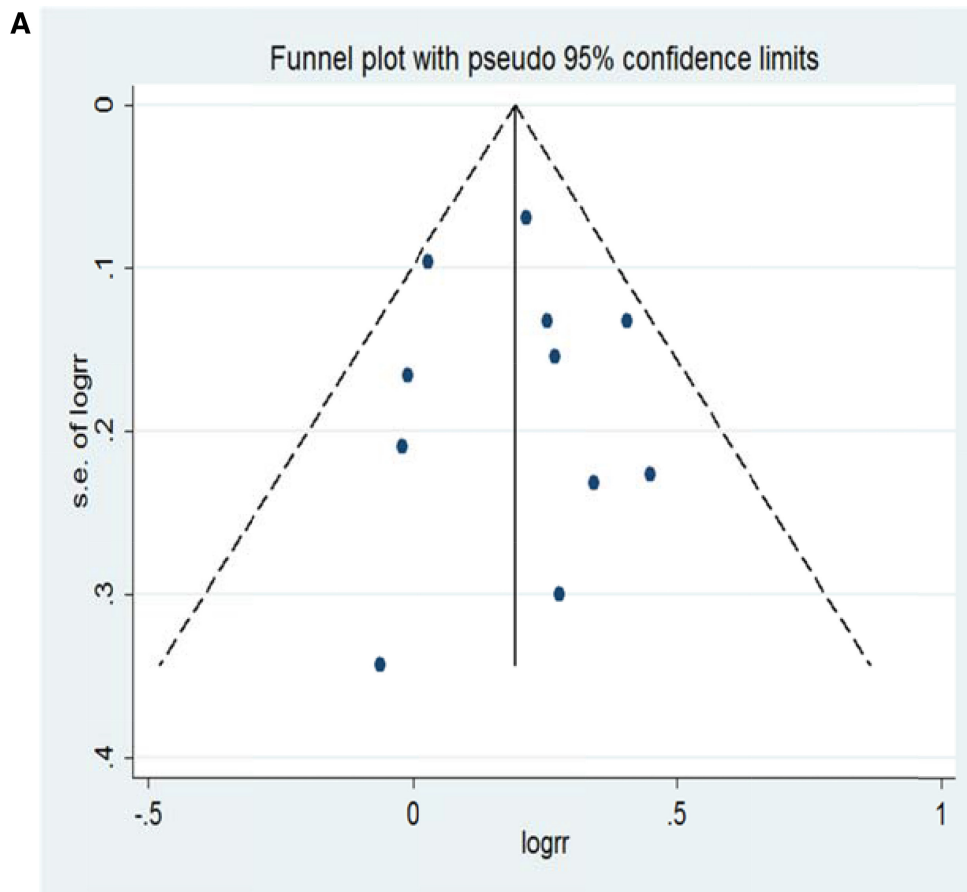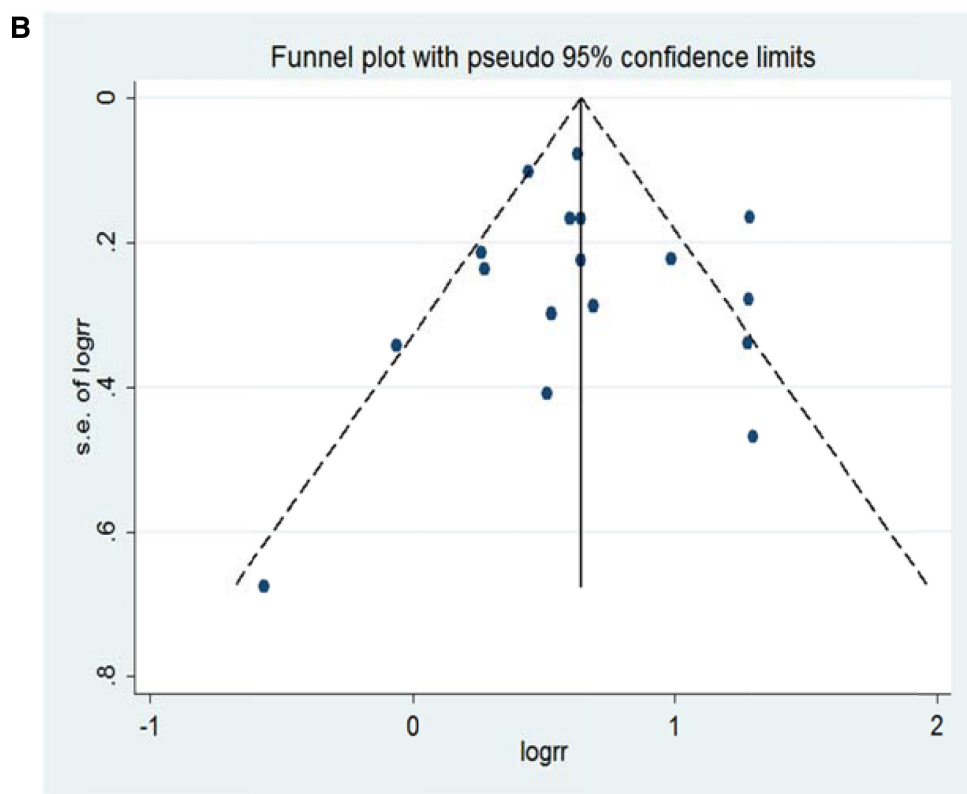

**Supplementary Figure 7: Funnel plot for non-Asian studies included in the meta-analysis.** (A) overweight,  $p = 0.877$  by Egger's test; (B) obesity,  $p = 0.794$  by Egger's test.



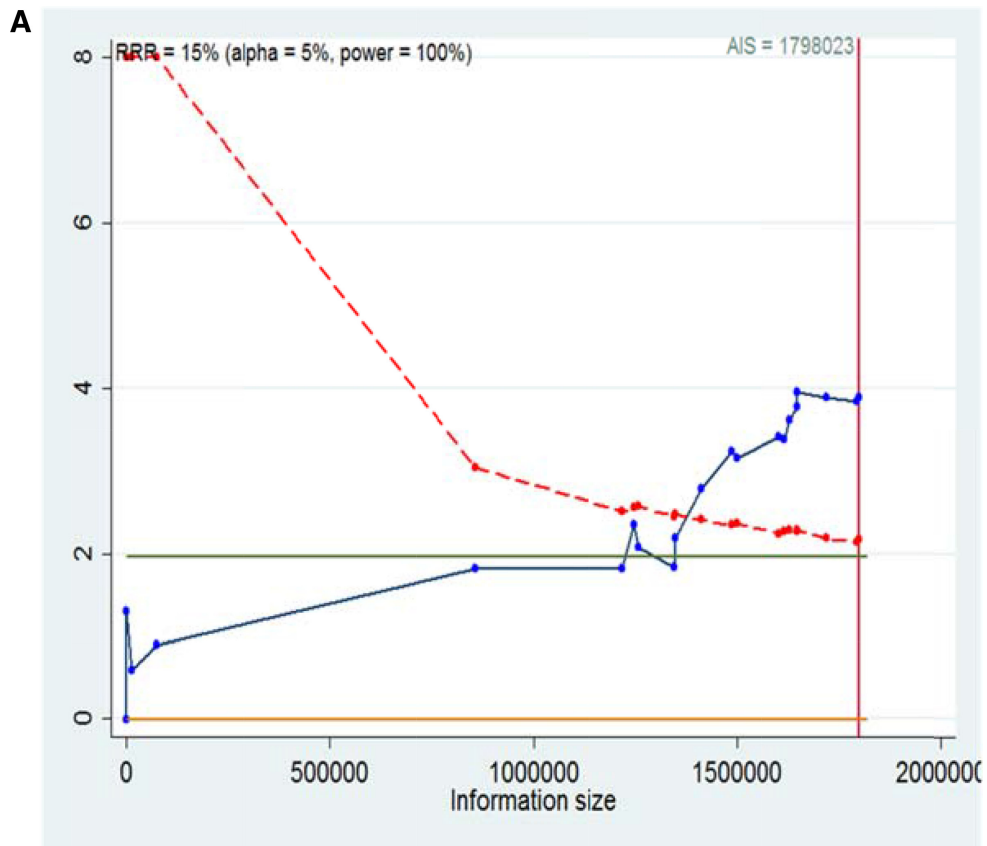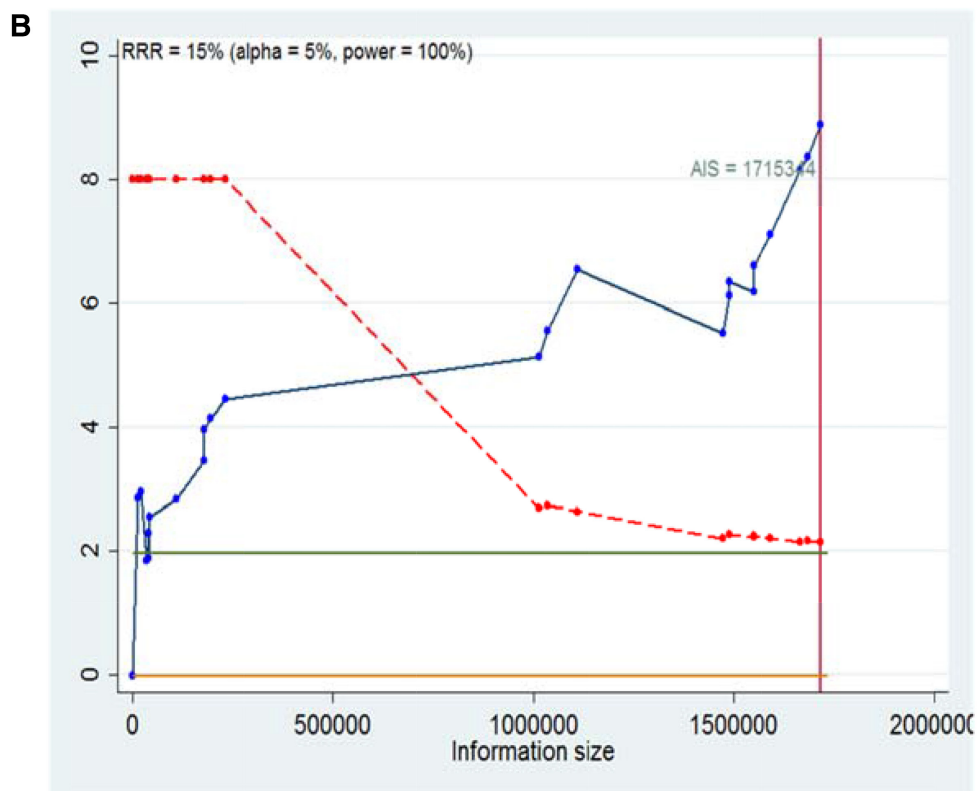

**Supplementary Figure 8:** Trial sequential analysis for the study of overall overweight (A) or obesity (B) and liver cancer incidence. (A) the AIS = 1798023,  $\alpha = 0.05$ , power = 100%; (B) Trial sequential analysis of the obesity. b, the AIS = 1715144,  $\alpha = 0.05$ , power = 100%. AIS: accrued information size.

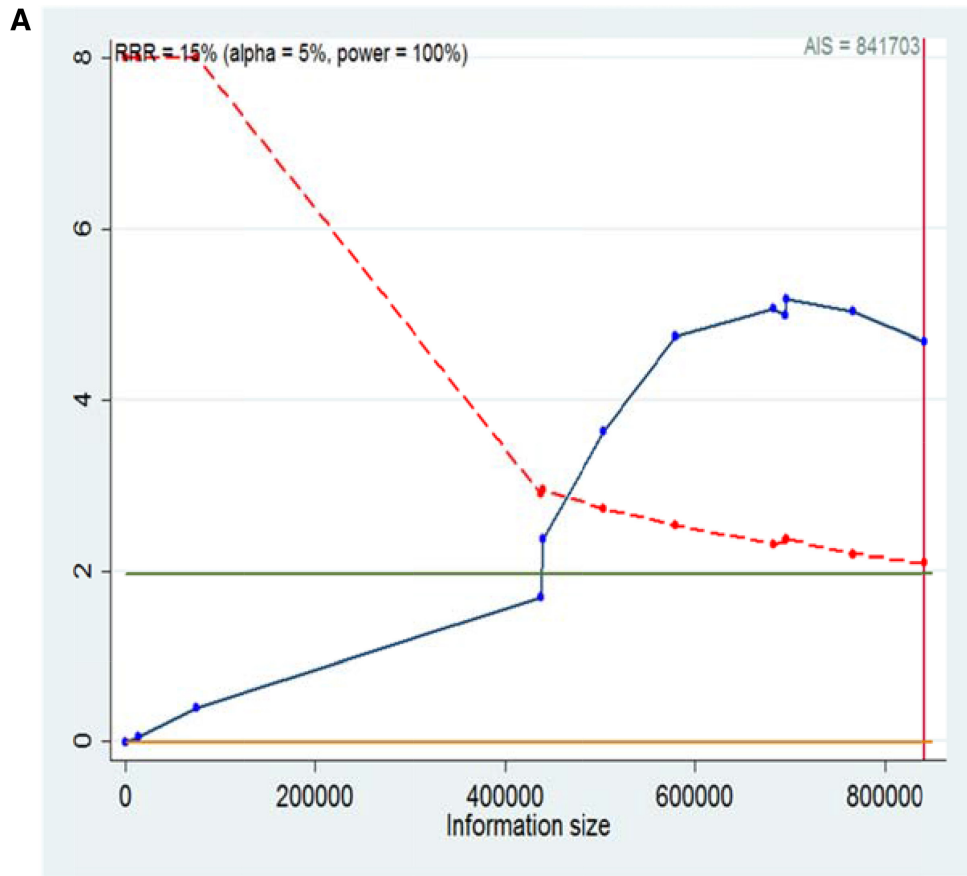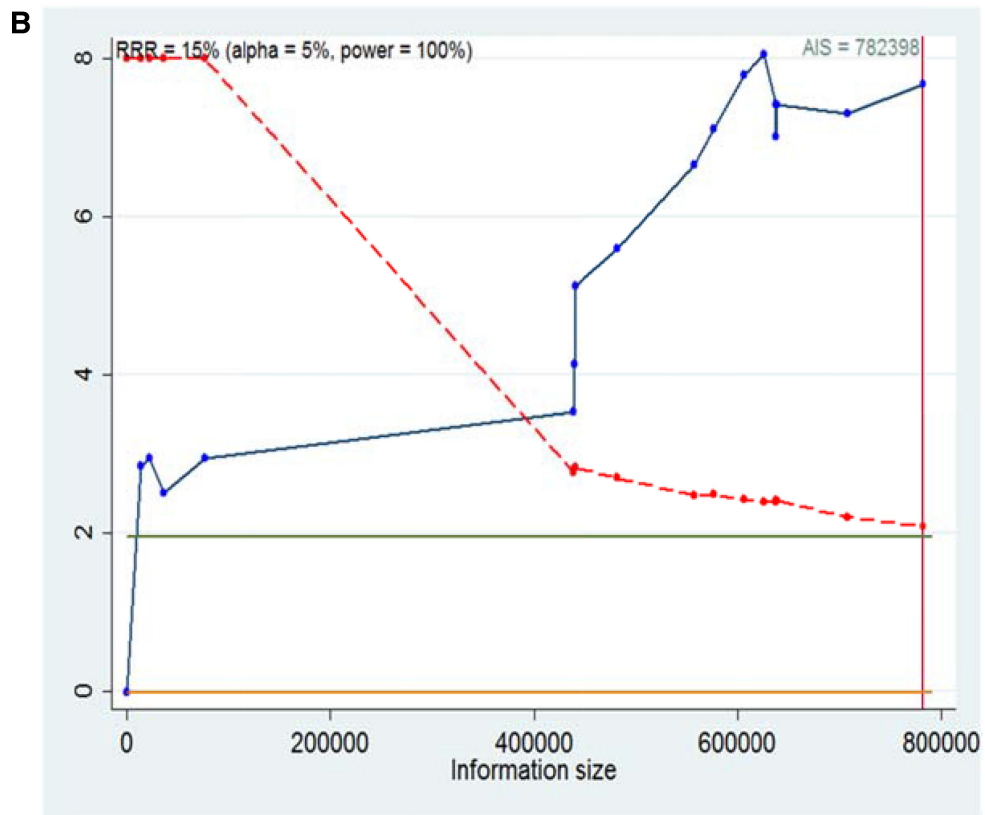

**Supplementary Figure 9:** Trial sequential analysis for the study of non-Asian overweight (A) or obesity (B). a, the AIS = 841703,  $\alpha = 0.05$ , power = 100%. b, the AIS = 782398,  $\alpha = 0.05$ , power = 100%. AIS: accrued information size.
